# Supplementary material
Source: PubMed Central journal article supplement (PMC10947550)
Supplement: NIHMS1918973-supplement-Supplementary_Material_2.pdf [file NIHMS1918973-supplement-Supplementary_Material_2.pdf]

## Supplemental Digital Content 2. List of Full-Text Articles Reviewed

| Title                                                                                                                                 | Year | Journal             | Authors                                                                                                                                                   | Include or Exclude? | Exclusion Reason                  |
|---------------------------------------------------------------------------------------------------------------------------------------|------|---------------------|-----------------------------------------------------------------------------------------------------------------------------------------------------------|---------------------|-----------------------------------|
| Colectomy for patients with super obesity: current practice and surgical morbidity in the United States                               | 2020 | Surg Obes Relat Dis | Abd El Aziz, M.A. and Grass, F. and Perry, W. and Behm, K.T. and Shawki, S.F. and Larson, D.W. and Mathis, K.L.                                           | Include             |                                   |
| African Americans experience higher operative morbidity after colorectal surgery than caucasians                                      | 2012 | Dis Colon Rectum    | Abe, S. and Bikhchandani, J. and Vo, D. and Ternent, C. and Beaty, J. and Blatchford, G. and Shashidharan, M. and Thorson, A.                             | Exclude             | Conference Abstract Only          |
| A comparison of trends in operative approach and postoperative outcomes for colorectal cancer surgery                                 | 2017 | J Surg Res          | Addae, Jamin K; Gani, Faiz; Fang, Sandy Y; Wick, Elizabeth C; Althumairi, Azah A; Efron, Jonathan E; Canner, Joseph K; Euhus, David M; Schneider, Eric B; | Include             |                                   |
| Race/ethnicity and socio-economic differences in colorectal cancer surgery outcomes: Analysis of the nationwide inpatient sample      | 2016 | BMC Cancer          | Akinyemiju, T. and Meng, Q. and Vin-Raviv, N.                                                                                                             | Exclude             | No comparison for robotic surgery |
| Trends in clinical and financial outcomes after robotic colorectal surgery over time: We need to keep pushing the technology envelope | 2018 | Dis Colon Rectum    | Al-Mazrou, A.M. and Baser, O. and Kiran, R.P.                                                                                                             | Exclude             | Conference Abstract Only          |
| Robotic versus laparoscopic sigmoid colectomy: analysis of healthcare cost and utilization project database                           | 2020 | Am Surg             | Alharthi, Samer; Reilly, Margaret; Arishi, Abdulaziz; Ahmed, Amin Mohamed; Chulkov, Maria; Qu, Weikai; Ortiz, Jorge; Nazzal, Munier; Pannell, Stephanie;  | Include             |                                   |

| Title                                                                                                                              | Year | Journal              | Authors                                                                                                                                                                                                                                                                                                                                                                                            | Include or Exclude? | Exclusion Reason                  |
|------------------------------------------------------------------------------------------------------------------------------------|------|----------------------|----------------------------------------------------------------------------------------------------------------------------------------------------------------------------------------------------------------------------------------------------------------------------------------------------------------------------------------------------------------------------------------------------|---------------------|-----------------------------------|
| National disparities in laparoscopic colorectal procedures for colon cancer.                                                       | 2014 | Surg Endosc          | Alnasser, Monirah and Schneider, Eric B and Gearhart, Susan L and Wick, Elizabeth C and Fang, Sandy H and Haider, Adil H and Efron, Jonathan E                                                                                                                                                                                                                                                     | Exclude             | No comparison for robotic surgery |
| PCN211 Predictors of minimally invasive surgical approach in medicare patients undergoing elective resection for colorectal cancer | 2019 | Value Health         | Ammann, E.M. and Johnston, S. and Nayak, A. and Nagle, D. and Patkar, A. and Charlton, M.                                                                                                                                                                                                                                                                                                          | Exclude             | Conference Abstract Only          |
| Minimally Invasive Colorectal Cancer Surgery in Europe: Implementation and Outcomes.                                               | 2016 | Medicine (Baltimore) | Babaei, Masoud and Balavarca, Yesilda and Jansen, Lina and Gondos, Adam and Lemmens, Valery and Sjöqvall, Annika and Brge Johannesen, Tom and Moreau, Michel and Gabriel, Liberale and Gonçsalves, Ana Filipa and Bento, Maria Jos© and van de Velde, Tony and Kempfer, Lana Raffaella and Becker, Nikolaus and Ulrich, Alexis and Ulrich, Cornelia M and Schrotz-King, Petra and Brenner, Hermann | Exclude             | Conference Abstract Only          |
| Population-based patient characteristics as predictors of laparoscopic versus open colorectal surgery vary among pathologies       | 2009 | Gastroenterology     | Barleben, A. and Magno, C.P. and Gandhi, D. and Mills, S. and Lane, J.S. and Stamos, M.J.                                                                                                                                                                                                                                                                                                          | Exclude             | Conference Abstract Only          |

| <b>Title</b>                                                                                                                                                                       | <b>Year</b> | <b>Journal</b>   | <b>Authors</b>                                                                                                                   | <b>Include or Exclude?</b> | <b>Exclusion Reason</b>                                               |
|------------------------------------------------------------------------------------------------------------------------------------------------------------------------------------|-------------|------------------|----------------------------------------------------------------------------------------------------------------------------------|----------------------------|-----------------------------------------------------------------------|
| Different strokes for different folks: Trends in elective surgery for diverticular disease                                                                                         | 2018        | Dis Colon Rectum | Batra, R. and Fuglestad, M. and Hall, B.R. and Luo, J. and Leinicke, J. and Langenfeld, S.                                       | Exclude                    | Conference Abstract Only                                              |
| Surgical techniques in the management of rectal cancer: a modified Delphi method by colorectal surgeons in Australia and New Zealand.                                              | 2019        | Tech Coloproctol | Bell SW and Heriot AG and Warriar SK and Farmer CK and Stevenson ARL and Bissett I and Kong JC and Solomon M                     | Include                    |                                                                       |
| Population demographics in geographic proximity to hospitals with robotic platforms do not correlate with disparities in access to robotic surgery                                 | 2020        | Surg Endosc      | Bingmer, Katherine; Kazimi, Maher; Wang, Victoria; Ofshteyn, Asya; Steinhagen, Emily; Stein, Sharon L;                           | Exclude                    | Did not compare utilization, only presence of hospitals with robotics |
| Predictors of Utilization and Quality Assessment in Robotic Rectal Cancer Resection: A Review of the National Cancer Database.                                                     | 2017        | Am Surg          | Buonpane C and Efiog E and Hunsinger M and Fluck M and Shabahang M and Wild J and Halm K and Long K and Buzas C and Blansfield J | Include                    |                                                                       |
| Disparity in use of laparoscopy for colon cancer in England                                                                                                                        | 2009        | Colorectal Dis   | Burns, E. and Aylin, P. and Kennedy, R.H. and Hanna, G. and Faiz, O.                                                             | Exclude                    | No comparison for robotic surgery                                     |
| Current status of robotic colorectal surgery in Australasia: A questionnaire survey of consultant members of the CSSANZ                                                            | 2019        | Dis Colon Rectum | Buxey, K.N. and Newstead, G. and Lam, F.                                                                                         | Exclude                    | Conference Abstract Only                                              |
| Inequalities in Implementation and Different Outcomes During the Growth of Laparoscopic Colorectal Cancer Surgery in England: A National Population-Based Study from 2002 to 2012. | 2018        | World J Surg     | Byrne BE and Vincent CA and Faiz OD                                                                                              | Exclude                    | No comparison for robotic surgery                                     |

| <b>Title</b>                                                                                                                               | <b>Year</b> | <b>Journal</b>        | <b>Authors</b>                                                                                       | <b>Include or Exclude?</b> | <b>Exclusion Reason</b>           |
|--------------------------------------------------------------------------------------------------------------------------------------------|-------------|-----------------------|------------------------------------------------------------------------------------------------------|----------------------------|-----------------------------------|
| Effect of academic status on outcomes of surgery for rectal cancer.                                                                        | 2018        | Surg Endosc           | Cagino K and Altieri MS and Yang J and Nie L and Talamini M and Spaniolas K and Denoya P and Pryor A | Exclude                    | No comparison for robotic surgery |
| Racial and Socioeconomic Disparities in the Surgical Management and Outcomes of Patients with Colorectal Carcinoma.                        | 2019        | World J Surg          | Cairns AL and Schlottmann F and Strassle PD and Di Corpo M and Patti MG                              | Exclude                    | No comparison for robotic surgery |
| Utilization of laparoscopy in colorectal surgery for cancer at academic medical centers: does site of surgery affect rate of laparoscopy?  | 2011        | Am Surg               | Carmichael JC and Masoomi H and Mills S and Stamos MJ and Nguyen NT                                  | Exclude                    | No comparison for robotic surgery |
| A national analysis of surgical and minimally invasive treatment patterns for early stage invasive rectal adenocarcinoma from 2004 to 2015 | 2019        | Dis Colon Rectum      | Cheng, D. and Bardakcioglu, O. and St Hill, C. and Chan, C. and Kirgan, D.                           | Exclude                    | Conference Abstract Only          |
| Trends in the diffusion of robotic surgery in prostate, uterus, and colorectal procedures: a retrospective population-based study          | 2021        | J Robot Surg          | Chung, Gary; Hinoul, Piet; Coplan, Paul; Yoo, Andrew;                                                | Include                    |                                   |
| The volume-outcome relationship in robotic proctectomy: does center volume matter? Results of a national cohort study.                     | 2020        | Surg Endosc           | Concors SJ and Murken DR and Hernandez PT and Mahmoud NN and Paulson EC                              | Include                    |                                   |
| How Is Rectal Cancer Managed: a Survey Exploring Current Practice Patterns in Canada.                                                      | 2019        | J Gastrointest Cancer | Crawford A and Firtell J and Caycedo-Marulanda A                                                     | Exclude                    | No comparison for robotic surgery |
| Examination of Racial Disparities in the Receipt of Minimally Invasive Surgery Among a National Cohort of                                  | 2016        | Dis Colon Rectum      | Damle RN and Flahive JM and Davids JS and Maykel JA and Sturrock PR and Alavi K                      | Include                    |                                   |

| <b>Title</b>                                                                                                                                                     | <b>Year</b> | <b>Journal</b>   | <b>Authors</b>                                                                                                          | <b>Include<br/>or<br/>Exclude?</b> | <b>Exclusion Reason</b>           |
|------------------------------------------------------------------------------------------------------------------------------------------------------------------|-------------|------------------|-------------------------------------------------------------------------------------------------------------------------|------------------------------------|-----------------------------------|
| Adult Patients Undergoing Colorectal Surgery.                                                                                                                    |             |                  |                                                                                                                         |                                    |                                   |
| Diffusion of technology: Trends in robotic-assisted colorectal surgery                                                                                           | 2016        | Dis Colon Rectum | Damle, A. and Damle, R. and Ma, D. and Flahive, J. and Davids, J. and Sturrock, P. and Maykel, J. and Alavi, K.         | Exclude                            | Conference Abstract Only          |
| A new look at the volume and outcome relationship in surgery for colorectal cancer                                                                               | 2013        | Dis Colon Rectum | Damle, R. and Macomber, C. and Flahive, J. and Maykel, J. and Sturrock, P. and Sweeney, W. and Santry, H. and Alavi, K. | Exclude                            | Conference Abstract Only          |
| Robotic rectal cancer surgery offers significant benefits over the laparoscopic technique                                                                        | 2015        | Gut              | Day, A. and Tilney, H. and Gudgeon, M.                                                                                  | Exclude                            | Conference Abstract Only          |
| Association of Medicaid Expansion with Diagnosis and Management of Colon Cancer.                                                                                 | 2021        | J Am Coll Surg   | Diehl TM and Abbott DE                                                                                                  | Exclude                            | No comparison for robotic surgery |
| Socioeconomic status and gender are associated with inequalities in surgical treatment and short-term outcomes in patients with non-metastatic colorectal cancer | 2013        | Gastroenterology | Dik, V.K. and Aarts, M.J. and Lemmens, V. and Siersema, P.D.                                                            | Exclude                            | Conference Abstract Only          |
| Socioeconomic status is associated with inequalities in surgical treatment and short-term outcomes in patients with non-metastatic colorectal cancer             | 2013        | Gastroenterology | Dik, V.K. and Aarts, M.J. and Lemmens, V.E. and Siersema, P.D.                                                          | Exclude                            | Conference Abstract Only          |

| Title                                                                                                                                                            | Year | Journal          | Authors                                                                                                                                                  | Include or Exclude? | Exclusion Reason                  |
|------------------------------------------------------------------------------------------------------------------------------------------------------------------|------|------------------|----------------------------------------------------------------------------------------------------------------------------------------------------------|---------------------|-----------------------------------|
| The effect of formal robotic residency training on the adoption of minimally invasive surgery by young colorectal surgeons                                       | 2018 | J Surg Educ      | Disbrow, David E; Pannell, Stephanie M; Shanker, Beth-Ann; Albright, Jeremy; Wu, Juan; Bastawrous, Amir; Soliman, Mark; Ferraro, Jane; Cleary, Robert K; | Exclude             | Program evaluation                |
| Neighborhood Variation in the Utilization of Laparoscopy for the Treatment of Colon Cancer.                                                                      | 2016 | Dis Colon Rectum | Doumouras AG and Saleh F and Eskicioglu C and Amin N and Cadeddu M and Hong D                                                                            | Exclude             | No comparison for robotic surgery |
| The effect of distance from an MIS training center on the utilization of laparoscopy for colorectal cancer                                                       | 2016 | Surg Endosc      | Doumouras, A. and Saleh, F. and Tsao, M. and Hong, D.                                                                                                    | Exclude             | Conference Abstract Only          |
| Laparoscopic partial colectomy is the most cost effective surgical approach to patients with colon cancer                                                        | 2019 | Gastroenterology | Eguia, E. and Sweigert, P. and Eberhardt, J. and Singer, M. and Afshar, M. and Kuo, P.A.U.L. and Baker, M.S.                                             | Exclude             | Conference Abstract Only          |
| Racial disparities and treatment outcomes among patients admitted with a diagnosis of colorectal cancer: Analysis of the 2014 national inpatient sample database | 2019 | J. Clin. Oncol.  | Enofe, I. and Rai, M.P. and Osaghae, O.                                                                                                                  | Exclude             | Conference Abstract Only          |
| Facility-level analysis of robot utilization across disciplines in the National Cancer Database.                                                                 | 2019 | J Robot Surg     | Fantus RJ and Cohen A and Riedinger CB and Kuchta K and Wang CH and Yao K and Park S                                                                     | Include             |                                   |
| Laparoscopic versus robotic rectal resection for rectal cancer in a veteran population                                                                           | 2013 | Am J Surg        | Fernandez, Ramiro; Anaya, Daniel A; Li, Linda T; Orcutt, Sonia T; Balentine, Courtney J; Awad, Samir A; Berger, David H; Albo, Daniel A; Artinyan, Avo;  | Include             |                                   |

| <b>Title</b>                                                                                                           | <b>Year</b> | <b>Journal</b>                    | <b>Authors</b>                                                                                                            | <b>Include or Exclude?</b> | <b>Exclusion Reason</b>           |
|------------------------------------------------------------------------------------------------------------------------|-------------|-----------------------------------|---------------------------------------------------------------------------------------------------------------------------|----------------------------|-----------------------------------|
| Laparoscopic colectomy for the treatment of cancer has been widely adopted in the United States.                       | 2012        | Dis Colon Rectum                  | Fox J and Gross CP and Longo W and Reddy V                                                                                | Exclude                    | No comparison for robotic surgery |
| With widespread adoption of MIS colectomy for colon cancer, does hospital type matter?                                 | 2019        | Surg Endosc                       | Freischlag K and Adam M and Turner M and Watson J and Ezekian B and Schroder PM and Mantyh C and Migaly J                 | Exclude                    | No comparison for robotic surgery |
| National disparities in minimally invasive surgery for rectal cancer.                                                  | 2016        | Surg Endosc                       | Gabriel E and Thirunavukarasu P and Al-Sukhni E and Attwood K and Nurkin SJ                                               | Include                    |                                   |
| National disparities in minimally invasive surgery for colorectal cancer                                               | 2015        | Ann Surg Oncol                    | Gabriel, E. and Thirunavukarasu, P. and Attwood, K. and Kuvshinoff, B.W. and Hochwald, S. and Nurkin, S.J.                | Exclude                    | Conference Abstract Only          |
| The effect of surgical approach on the use of adjuvant chemotherapy following low anterior resection for rectal cancer | 2014        | Gastroenterology                  | Ganapathi, A.M. and Englum, B.R. and Speicher, P.J. and Castleberry, A. and Thacker, J.K. and Mantyh, C.R. and Migaly, J. | Exclude                    | Conference Abstract Only          |
| Racial and Ethnic Disparities in the Surgical Management and Outcomes of Colorectal Cancer in the Non-elective Setting | 2021        | ProQuest Dissertations and Theses | Grant, Heather Margaret and Rodday, Angie Mae                                                                             | Exclude                    | No comparison for robotic surgery |
| Disparities in management and outcomes of young adults with colorectal cancer                                          | 2015        | Gastroenterology                  | Gray, D.M. and Hussan, H. and Hinton, A. and Stanich, P.P.                                                                | Exclude                    | Conference Abstract Only          |

| <b>Title</b>                                                                                                                                            | <b>Year</b> | <b>Journal</b>   | <b>Authors</b>                                                                                                                                   | <b>Include or Exclude?</b> | <b>Exclusion Reason</b>           |
|---------------------------------------------------------------------------------------------------------------------------------------------------------|-------------|------------------|--------------------------------------------------------------------------------------------------------------------------------------------------|----------------------------|-----------------------------------|
| Disparities in the Utilization of Laparoscopic Surgery for Colon Cancer in Rural Nebraska: A Call for Placement and Training of Rural General Surgeons. | 2015        | J Rural Health   | Gruber K and Soliman AS and Schmid K and Rettig B and Ryan J and Watanabe-Galloway S                                                             | Exclude                    | No comparison for robotic surgery |
| Robotic-assisted colorectal surgery in the United States: a nationwide analysis of trends and outcomes                                                  | 2013        | World J Surg     | Halabi, Wissam J; Kang, Celeste Y; Jafari, Mehraneh D; Nguyen, Vinh Q; Carmichael, Joseph C; Mills, Steven; Stamos, Michael J; Pigazzi, Alessio; | Include                    |                                   |
| Comparison of minimally invasive and open proctectomy for rectal adenocarcinoma: A NSQIP analysis of postoperative and short term oncologic outcomes    | 2018        | Dis Colon Rectum | Hanna, M. and Al-Mazrou, A.M. and Kiran, R.P.                                                                                                    | Exclude                    | Conference Abstract Only          |
| Disparities in the utilization of laparoscopic colectomy from 2000 through 2005                                                                         | 2009        | Dis Colon Rectum | Hardiman, K. and Lanxon-Cookson, K. and Morris, M. and Diggs, B. and Sheppard, B. and Herzig, D.                                                 | Exclude                    | Conference Abstract Only          |
| Barriers to laparoscopic colon resection for cancer: a national analysis.                                                                               | 2018        | Surg Endosc      | Hawkins AT and Ford MM and Benjamin Hopkins M and Muldoon RL and Wanderer JP and Parikh AA and Geiger TM                                         | Exclude                    | No comparison for robotic surgery |
| Association Between Medicaid Expansion and Diagnosis and Management of Colon Cancer.                                                                    | 2021        | J Am Coll Surg   | Hoehn RS and Rieser CJ and Phelos H and Sabik LM and Nassour I and Paniccia A and Zureikat AH and Tohme ST                                       | Exclude                    | No comparison for robotic surgery |



| <b>Title</b>                                                                                                                                         | <b>Year</b> | <b>Journal</b>         | <b>Authors</b>                                                                                                              | <b>Include or Exclude?</b> | <b>Exclusion Reason</b>                        |
|------------------------------------------------------------------------------------------------------------------------------------------------------|-------------|------------------------|-----------------------------------------------------------------------------------------------------------------------------|----------------------------|------------------------------------------------|
| Uptake of elective laparoscopic colectomy for colon cancer in Canada from 2004/05 to 2014/15: a descriptive analysis.                                | 2018        | CMAJ Open              | Hoogerboord CM and Levy AR and Hu M and Flowerdew G and Porter G                                                            | Exclude                    | Conference Abstract Only                       |
| Patient Factors Limit Colon Cancer Survival at Safety-Net Hospitals: A National Analysis.                                                            | 2021        | J Surg Res             | Hrebinko KA and Rieser C and Nassour I and Tohme S and Sabik LM and Khan S and Medich DS and Zureikat AH and Hoehn RS       | Exclude                    | No comparison for robotic surgery              |
| Underutilization of laparoscopy surgery for elective colon resection in texas                                                                        | 2018        | Dis Colon Rectum       | Hughes, B.D. and Shan, Y. and Amirkhosravi, F. and Mehta, H.B. and Senagore, A.                                             | Exclude                    | Conference Abstract Only                       |
| Professional networks and the alignment of individual perceptions about medical innovation                                                           | 2018        | Health Care Manage Rev | Iacopino, Valentina; Mascia, Daniele; Cicchetti, Americo;                                                                   | Exclude                    | No comparison specific to colorectal surgeries |
| Emergent colectomy for colorectal cancer: A comparative analysis of open vs. minimally invasive approach                                             | 2020        | Dis Colon Rectum       | Jecius, H. and Krall, E. and Tso, D. and Hanna, K. and Hamidi, M. and Nfonsam, V.                                           | Exclude                    | Conference Abstract Only                       |
| Disparities in Robotic Colorectal Surgery: A National Surgical Quality Improvement Program Study                                                     | 2020        | J Am Coll Surg         | Jochum, S.B. and King-Mullins, E.M. and Ritz, E.M. and Govekar, H.R. and Bhamra, A.R. and Saclarides, T.J. and Hayden, D.M. | Exclude                    | Conference Abstract Only                       |
| The impact of socioeconomic status on the surgical treatment of rectal cancer at community versus academic centers: A national cancer database study | 2019        | Dis Colon Rectum       | Johnson, K.                                                                                                                 | Exclude                    | Conference Abstract Only                       |
| Robotic versus laparoscopic surgery for rectal cancer: An analysis of the nationwide inpatient sample (NIS) database                                 | 2016        | Ann Surg Oncol         | Julien, M. and Shabahang, M. and Blansfield, J. and Halm, K. and Long, K.                                                   | Exclude                    | Conference Abstract Only                       |

| <b>Title</b>                                                                                                                          | <b>Year</b> | <b>Journal</b>      | <b>Authors</b>                                                                                                                                                   | <b>Include or Exclude?</b> | <b>Exclusion Reason</b>                        |
|---------------------------------------------------------------------------------------------------------------------------------------|-------------|---------------------|------------------------------------------------------------------------------------------------------------------------------------------------------------------|----------------------------|------------------------------------------------|
| Diffusion of robotic-assisted laparoscopic technology across specialties: a national study from 2008 to 2013                          | 2018        | Surg Endosc         | Juo, Yen-Yi; Mantha, Aditya; Abiri, Ahmad; Lin, Anne; Dutson, Erik;                                                                                              | Exclude                    | No comparison specific to colorectal surgeries |
| Is the robot worth it? A population-based analysis of 90-day cost & hospital utilization for robotic surgery in colon & rectal cancer | 2018        | Dis Colon Rectum    | Justiniano, C.F. and Becerra, A.Z. and Xu, Z. and Aquina, C.T. and Boodry, C. and Schymura, M.J. and Boscoe, F.P. and Noyes, K. and Temple, L.K. and Fleming, F. | Exclude                    | Conference Abstract Only                       |
| The Trends in Adoption, Outcomes, and Costs of Laparoscopic Surgery for Colorectal Cancer in the Elderly Population.                  | 2021        | J Gastrointest Surg | Keller DS and de Paula TR and Qiu J and Kiran RP                                                                                                                 | Exclude                    | No comparison for robotic surgery              |
| Predicting opportunities to increase utilization of laparoscopy for colon cancer.                                                     | 2017        | Surg Endosc         | Keller DS and Parikh N and Senagore AJ                                                                                                                           | Exclude                    | No comparison for robotic surgery              |
| Predicting opportunities to increase utilization of laparoscopy for rectal cancer.                                                    | 2018        | Surg Endosc         | Keller DS and Qiu J and Senagore AJ                                                                                                                              | Exclude                    | No comparison for robotic surgery              |
| Trends and outcomes of robotic surgery for gastrointestinal (GI) cancers in the USA: maintaining perioperative and oncologic safety.  | 2020        | Surg Endosc         | Konstantinidis IT and Ituarte P and Woo Y and Warner SG and Melstrom K and Kim J and Singh G and Lee B and Fong Y and Melstrom LG                                | Include                    |                                                |
| Rapid rise of robotic surgery in gastrointestinal (GI) malignancies: Are we maintaining perioperative and oncologic safety?           | 2018        | Ann Surg Oncol      | Konstantinidis, I. and Woo, Y. and Warner, S. and Melstrom, K. and Kim, J. and Singh, G. and Fong, Y. and Melstrom, L.G.                                         | Exclude                    | Conference Abstract Only                       |

| Title                                                                                                                                                                       | Year | Journal             | Authors                                                                                                                                | Include or Exclude? | Exclusion Reason                                            |
|-----------------------------------------------------------------------------------------------------------------------------------------------------------------------------|------|---------------------|----------------------------------------------------------------------------------------------------------------------------------------|---------------------|-------------------------------------------------------------|
| Trends and outcomes of surgical treatment for colorectal cancer between 2004 and 2012-an analysis using national inpatient database                                         | 2017 | Sci Rep             | Lee, Meng-Tse Gabriel; Chiu, Chong-Chi; Wang, Chia-Chun; Chang, Chia-Na; Lee, Shih-Hao; Lee, Matthew; Hsu, Tzu-Chun; Lee, Chien-Chang; | Include             |                                                             |
| Hand-Assisted Laparoscopic Colectomy Improves Perioperative Outcomes Without Increasing Operative Time Compared to the Open Approach: a National Analysis of 8791 Patients. | 2017 | J Gastrointest Surg | Leraas HJ and Ong CT and Sun Z and Adam MA and Kim J and Gilmore BF and Ezekian B and Nag US and Mantyh CR and Migaly J                | Exclude             | No comparison for robotic surgery                           |
| Multidisciplinary team management of colorectal cancer is associated with increased rates of laparoscopic resection                                                         | 2011 | Surg Endosc         | Levine, R.A. and Wasvary, H.                                                                                                           | Exclude             | Conference Abstract Only                                    |
| Do specific operative approaches and insurance status impact timely access to colorectal cancer care?                                                                       | 2021 | Surg Endosc         | Lo BD and Zhang GQ and Stem M and Sahyoun R and Efron JE and Safar B and Atallah C                                                     | Include             |                                                             |
| Regional Variation in Laparoscopy Use for Elective Colon Cancer Treatment in Canada: The Importance of Fellowship Training Sites.                                           | 2021 | Dis Colon Rectum    | Logie K and Doumouras AG and Springer JE and Eskicioglu C and Hong D                                                                   | Exclude             | No comparison for robotic surgery                           |
| Trends in the diffusion of robotic surgery: A retrospective observational study                                                                                             | 2017 | Int J Med Robot     | Marcus, Hani J; Hughes-Hallett, Archie; Payne, Christopher J; Cundy, Thomas P; Nandi, Dipankar; Yang, Guang-Zhong; Darzi, Ara;         | Exclude             | No comparison specific to colorectal surgeries              |
| Hospital Minimally Invasive Surgery Utilization for Gastrointestinal Cancer.                                                                                                | 2018 | Ann Surg            | Mason MC and Tran Cao HS and Awad SS and Farjah F and Chang GJ and Massarweh NN                                                        | Exclude             | Evaluated trends, but no comparisons attributed to patient, |

| Title                                                                                                          | Year | Journal          | Authors                                                                                                    | Include or Exclude? | Exclusion Reason                      |
|----------------------------------------------------------------------------------------------------------------|------|------------------|------------------------------------------------------------------------------------------------------------|---------------------|---------------------------------------|
|                                                                                                                |      |                  |                                                                                                            |                     | provider/surgeon, or hospital factors |
| Comparison of 30-day postoperative outcomes after laparoscopic vs robotic colectomy                            | 2016 | J Am Coll Surg   | Miller, Peter E; Dao, Haisar; Paluvoi, Nivedh; Bailey, Matthew; Margolin, David; Shah, Nishit; Vargas, HD; | Include             |                                       |
| Robotic versus laparoscopic colectomy for stage I-III colon cancer: oncologic and long-term survival outcomes. | 2018 | Surg Endosc      | Mirkin KA and Kulaylat AS and Hollenbeak CS and Messaris E                                                 | Include             |                                       |
| Colorectal liver metastases management in the Veterans Health Administration: Geographic disparity             | 2016 | J. Clin. Oncol.  | Mobarek, D.A. and Visser, B.C. and Krasnow, S. and Chang, J.W. and Nechodom, P. and DuVall, S.L.           | Exclude             | Conference Abstract Only              |
| Variations in Laparoscopic Colectomy Utilization in the United States.                                         | 2015 | Dis Colon Rectum | Moghadamyeghaneh Z and Carmichael JC and Mills S and Pigazzi A and Nguyen NT and Stamos MJ                 | Exclude             | No comparison for robotic surgery     |
| Variations in laparoscopic colectomy utilization in different hospitals in the United States                   | 2015 | Dis Colon Rectum | Moghadamyeghaneh, Z. and Carmichael, J. and Mills, S. and Pigazzi, A. and Stamos, M.                       | Exclude             | Conference Abstract Only              |
| Outcomes of open, laparoscopic, and robotic abdominoperineal resections in patients with rectal cancer         | 2015 | Dis Colon Rectum | Moghadamyeghaneh, Zhobin; Phelan, Michael; Smith, Brian R; Stamos, Michael J;                              | Include             |                                       |

| Title                                                                                                               | Year | Journal              | Authors                                                                                                                            | Include or Exclude? | Exclusion Reason                  |
|---------------------------------------------------------------------------------------------------------------------|------|----------------------|------------------------------------------------------------------------------------------------------------------------------------|---------------------|-----------------------------------|
| Rectal cancer in the young: analysis of contributing factors and surgical outcomes.                                 | 2019 | J Gastrointest Oncol | Mogor O and Ewongwo A and Ojameruaye O and Pandit V and Omesiete P and Martinez C and Hsu P and Scott A and Elquza E and Nfonsam V | Exclude             | No comparison for robotic surgery |
| Changing trends in rectal cancer surgery in Ontario: 2002-2009.                                                     | 2012 | Colorectal Dis       | Musselman RP and Gomes T and Chan BP and Auer RC and Moloo H and Mamdani M and Al-Omran M and Al-Obeed O and Boushey RP            | Exclude             | No comparison for robotic surgery |
| The adoption of laparoscopic techniques in the management of emergency colorectal surgery: A population-based study | 2012 | Dis Colon Rectum     | Musselman, R. and Gomes, T. and Chan, B. and Auer, R. and Moloo, H. and Al-Omran, M. and Al-Obeed, O. and Boushey, R.              | Exclude             | Conference Abstract Only          |
| Laparoscopic vs. open surgery for rectal cancer.A NSQIP analysis                                                    | 2010 | Ann Surg Oncol       | Nurkin, S. and Kakarla, R. and Ruiz, D. and Jeganathan, R. and Turner, J. and Tiszenkel, H.                                        | Exclude             | Conference Abstract Only          |
| Robotic proctectomy for rectal cancer in the US: a skewed population.                                               | 2020 | Surg Endosc          | Ofshteyn A and Bingmer K and Towe CW and Steinhagen E and Stein SL                                                                 | Include             |                                   |
| Robotic surgery in the us: A skewed population                                                                      | 2019 | Surg. Endosc.        | Ofshteyn, A. and Bingmer, K. and Towe, C.W. and Steinhagen, E. and Stein, S.L.                                                     | Exclude             | Conference Abstract Only          |

| <b>Title</b>                                                                                                                                           | <b>Year</b> | <b>Journal</b>                 | <b>Authors</b>                                                                                                                     | <b>Include or Exclude?</b> | <b>Exclusion Reason</b>           |
|--------------------------------------------------------------------------------------------------------------------------------------------------------|-------------|--------------------------------|------------------------------------------------------------------------------------------------------------------------------------|----------------------------|-----------------------------------|
| Influence of surgeon specialty and volume on the utilization of minimally invasive surgery and outcomes for colorectal cancer: a retrospective review. | 2020        | Surg Endosc                    | Osagiede O and Haehn DA and Spaulding AC and Otto N and Cochuyt JJ and Lemini R and Merchea A and Kelley S and Colibaseanu DT      | Exclude                    | No comparison for robotic surgery |
| Trends in the Use of Laparoscopy and Robotics for Colorectal Cancer in Florida.                                                                        | 2019        | J Laparoendosc Adv Surg Tech A | Osagiede O and Spaulding AC and Cochuyt JJ and Naessens J and Merchea A and Colibaseanu DT                                         | Include                    |                                   |
| Factors Associated With Minimally Invasive Surgery for Colorectal Cancer in Emergency Settings.                                                        | 2019        | J Surg Res                     | Osagiede O and Spaulding AC and Cochuyt JJ and Naessens JM and Merchea A and Crandall M and Colibaseanu DT                         | Exclude                    | No comparison for robotic surgery |
| Disparities in minimally invasive surgery for colorectal cancer in Florida.                                                                            | 2019        | Am J Surg                      | Osagiede O and Spaulding AC and Cochuyt JJ and Naessens JM and Merchea A and Kasi PM and Crandall M and Colibaseanu DT             | Exclude                    | No comparison for robotic surgery |
| The determinants of minimally invasive surgery for colorectal cancer in emergency versus elective settings                                             | 2019        | Dis Colon Rectum               | Osagiede, O. and Spaulding, A. and Cochuyt, J. and Naessens, J. and Merchea, A. and Crandall, M. and Colibaseanu, D.               | Exclude                    | Conference Abstract Only          |
| Minimally invasive colorectal surgery in the morbid obese: does size really matter?                                                                    | 2018        | Surg Endosc                    | Panteleimonitis, Sofoklis; Popeskou, Sotirios; Harper, Mick; Kandala, Ngianga; Figueiredo, Nuno; Qureshi, Tahseen; Parvaiz, Amjad; | Include                    |                                   |

| <b>Title</b>                                                                                                                                                     | <b>Year</b> | <b>Journal</b>   | <b>Authors</b>                                                                                      | <b>Include or Exclude?</b> | <b>Exclusion Reason</b>           |
|------------------------------------------------------------------------------------------------------------------------------------------------------------------|-------------|------------------|-----------------------------------------------------------------------------------------------------|----------------------------|-----------------------------------|
| Trends in utilization, conversion rates, and outcomes for minimally invasive approaches to non-metastatic rectal cancer: a national cancer database analysis.    | 2021        | Surg Endosc      | Parascandola SA and Hota S and Sparks AD and Boulos S and Cavallo K and Kim G and Obias V           | Include                    |                                   |
| Management of colon cancer at an urban veterans' affairs system: Does race impact surgical options and outcomes?                                                 | 2017        | J Am Coll Surg   | Pate, A. and Kwong, C. and Martinez, M. and Webb, H. and Martin, T.R.                               | Exclude                    | Conference Abstract Only          |
| Association of hospital factors and socioeconomic status with the utilization of minimally invasive surgery for colorectal cancer over a decade.                 | 2021        | Surg Endosc      | Patel R and Pant K and Patel KS and Merchant AM and Alvarez-Downing MM                              | Exclude                    | No comparison for robotic surgery |
| Location matters: Factors associated with access to robotic surgery for rectal cancer                                                                            | 2014        | J Am Coll Surg   | Probst, C.P. and Aquina, C.T. and Kelly, K.N. and Noyes, K. and Fleming, F. and Monson, J.R.T..     | Exclude                    | Conference Abstract Only          |
| Treatment reality with respect to laparoscopic surgery of colonic cancer in Germany.                                                                             | 2014        | Chirurg          | Ptok H and Gastinger I and Bruns C and Lippert H                                                    | Exclude                    | Not in English                    |
| Association of rurality and race with surgical treatment and outcomes for nonmetastatic colon cancer                                                             | 2021        | J. Clin. Oncol.  | Ramkumar, N. and Colla, C. and Wong, S.L. and Wang, Q. and Brooks, G.A.                             | Exclude                    | Conference Abstract Only          |
| Patient, Hospital, and Geographic Disparities in Laparoscopic Surgery Use Among Surveillance, Epidemiology, and End Results-Medicare Patients With Colon Cancer. | 2017        | Dis Colon Rectum | Ratnapradipa KL and Lian M and Jeffe DB and Davidson NO and Eberth JM and Pruitt SL and Schootman M | Exclude                    | No comparison for robotic surgery |
| Utilization of laparoscopic colectomy in the United States before and after                                                                                      | 2011        | Ann Surg         | Rea JD and Cone MM and Diggs BS and Deveney KE and Lu KC and Herzig DO                              | Exclude                    | No comparison for robotic surgery |

| <b>Title</b>                                                                                                                                   | <b>Year</b> | <b>Journal</b>                     | <b>Authors</b>                                                                                                                                       | <b>Include or Exclude?</b> | <b>Exclusion Reason</b>           |
|------------------------------------------------------------------------------------------------------------------------------------------------|-------------|------------------------------------|------------------------------------------------------------------------------------------------------------------------------------------------------|----------------------------|-----------------------------------|
| the clinical outcomes of surgical therapy study group trial.                                                                                   |             |                                    |                                                                                                                                                      |                            |                                   |
| Utilization of laparoscopic colectomy in the United States before and after the Clinical Outcomes of Surgical Therapy (COST) study group trial | 2010        | Dis Colon Rectum                   | Rea, J. and Cone, M. and Diggs, B. and Deveney, K. and Lu, K. and Herzig, D.                                                                         | Exclude                    | Conference Abstract Only          |
| Geographic variation in use of laparoscopic colectomy for colon cancer.                                                                        | 2014        | J Clin Oncol                       | Reames BN and Sheetz KH and Waits SA and Dimick JB and Regenbogen SE                                                                                 | Exclude                    | No comparison for robotic surgery |
| Healthcare disparities exist in laparoscopic colectomy for colon cancer                                                                        | 2011        | Ann Surg Oncol                     | Robinson, C.N. and Sansgiry, S. and Balentine, C.J. and Marshall, C.L. and Tewani, S. and Anaya, D.A. and Artinyan, A. and Albo, D. and Berger, D.H. | Exclude                    | Conference Abstract Only          |
| Disparities in the use of minimally invasive surgery for colorectal disease                                                                    | 2012        | J Gastrointest Surg                | Robinson, Celia N; Balentine, Courtney J; Sansgiry, Shubhada; Berger, David H;                                                                       | Exclude                    | No comparison for robotic surgery |
| Colon Cancer Surgery: A Retrospective Study Based on a Large Administrative Database.                                                          | 2016        | Surg Laparosc Endosc Percutan Tech | Saia M and Buja A and Mantoan D and Agresta F and Baldo V                                                                                            | Exclude                    | Conference Abstract Only          |
| Isolated rectal cancer surgery: a 2007-2014 population study based on a large administrative database.                                         | 2017        | Updates Surg                       | Saia M and Buja A and Mantoan D and Sartor G and Agresta F and Baldo V                                                                               | Exclude                    | No comparison for robotic surgery |



| Title                                                                                                                                       | Year | Journal             | Authors                                                                                                         | Include or Exclude? | Exclusion Reason                                                                                                  |
|---------------------------------------------------------------------------------------------------------------------------------------------|------|---------------------|-----------------------------------------------------------------------------------------------------------------|---------------------|-------------------------------------------------------------------------------------------------------------------|
| The disparity of care and outcomes for medicaid patients undergoing colectomy                                                               | 2019 | J Surg Res          | Sastow, Dahniel L; White, Robert S; Mauer, Elizabeth; Chen, Yuefan; Gaber-Baylis, Licia K; Turnbull, Zachary A; | Include             |                                                                                                                   |
| Inequalities in access to minimally invasive general surgery: a comprehensive nationwide analysis across 20 years.                          | 2020 | Surg Endosc         | Schneider MA and Gero D and MÅ¼aller M and Horisberger K and Rickenbacher A and Turina M                        | Exclude             | No comparison for robotic surgery                                                                                 |
| Differences in effectiveness and use of robotic surgery in patients undergoing minimally invasive colectomy                                 | 2017 | J Gastrointest Surg | Schootman, M; Hendren, S; Loux, T; Ratnapradipa, K; Eberth, JM; Davidson, NO;                                   | Include             |                                                                                                                   |
| Adoption of robotic technology for treating colorectal cancer                                                                               | 2016 | Dis Colon Rectum    | Schootman, Mario; Hendren, Samantha; Ratnapradipa, Kendra; Stringer, Lisa; Davidson, Nick O;                    | Exclude             | Focused on offering robotic surgery or having robotic surgery technology instead of utlization of robotic surgery |
| National disparities in use of minimally invasive surgery for rectal cancer in older adults                                                 | 2021 | J Am Geriatr Soc    | Simon, Hillary L; Reif de Paula, Thais; Spigel, Zachary A; Keller, Deborah S;                                   | Include             |                                                                                                                   |
| Utilization of minimally invasive versus open colectomy for colon cancer and perioperative/short-term oncologic outcomes: Are we there yet? | 2017 | J. Clin. Oncol.     | Smith, J.K. and Esnaola, N.F.                                                                                   | Exclude             | Conference Abstract Only                                                                                          |

| Title                                                                                                                                          | Year | Journal             | Authors                                                                                                                              | Include or Exclude? | Exclusion Reason                  |
|------------------------------------------------------------------------------------------------------------------------------------------------|------|---------------------|--------------------------------------------------------------------------------------------------------------------------------------|---------------------|-----------------------------------|
| Laparoscopic colectomy for colon cancer in the elderly: Analysis of risk, perioperative outcomes, and cost                                     | 2014 | Dis Colon Rectum    | Sneider, E. and Cherng, N. and Damle, R. and Baldor, D. and Sturrock, P. and Maykel, J. and Davids, J. and Sweeney, W. and Alavi, K. | Exclude             | Conference Abstract Only          |
| Hospital robotic use for colorectal cancer care.                                                                                               | 2021 | J Robot Surg        | Spaulding AC and Hamadi H and Osagiede O and Lemini R and Cochuyt JJ and Watson J and Naessens JM and Colibaseanu DT                 | Include             |                                   |
| Regional Variation in the Utilization of Laparoscopy for the Treatment of Rectal Cancer: The Importance of Fellowship Training Sites.          | 2020 | Ann Surg Oncol      | Springer JE and Doumouras AG and Eskicioglu C and Hong D                                                                             | Exclude             | No comparison for robotic surgery |
| Regional variation in the utilization of laparoscopy for the treatment of rectal cancer: The importance of fellowship training sites           | 2019 | Dis Colon Rectum    | Springer, J.E. and Doumouras, A. and Amin, N. and Cadeddu, M. and Eskicioglu, C. and Hong, D.                                        | Exclude             | Conference Abstract Only          |
| Laparoscopic vs open colectomy for colon cancer: results from a large nationwide population-based analysis.                                    | 2008 | J Gastrointest Surg | Steele SR and Brown TA and Rush RM and Martin MJ                                                                                     | Exclude             | No comparison for robotic surgery |
| The impact of practice environment on laparoscopic colectomy utilization following colorectal residency: a survey of the ASCRS Young Surgeons. | 2012 | Colorectal Dis      | Steele SR and Stein SL and Bordeianou LG and Johnson E and Herzig DO and Champagne BJ                                                | Exclude             | No comparison for robotic surgery |

| Title                                                                                                                                                                   | Year | Journal          | Authors                                                                                                                                 | Include or Exclude? | Exclusion Reason                  |
|-------------------------------------------------------------------------------------------------------------------------------------------------------------------------|------|------------------|-----------------------------------------------------------------------------------------------------------------------------------------|---------------------|-----------------------------------|
| Robotic surgery trends in general surgical oncology from the National Inpatient Sample                                                                                  | 2019 | Surg Endosc      | Stewart, Camille L; Ituarte, Philip HG; Melstrom, Kurt A; Warner, Susanne G; Melstrom, Laleh G; Lai, Lily L; Fong, Yuman; Woo, Yanghee; | Exclude             | No comparison for robotic surgery |
| Laparoscopic versus open abdominoperineal resection for rectal cancer: Is there a short-term advantage in complication rates with a minimally invasive approach?        | 2011 | Gastroenterology | Stewart, D.B. and Hollenbeak, C.S. and Boltz, M.M.                                                                                      | Exclude             | Conference Abstract Only          |
| National utilization of laparoscopic and robotic-assisted surgery for rectal cancer: An analysis of recent trends                                                       | 2013 | Dis Colon Rectum | Stone, A. and Finlayson, S. and Holubar, S.                                                                                             | Exclude             | Conference Abstract Only          |
| National utilization of minimally invasive surgery for colon resection: An analysis of recent trends                                                                    | 2012 | Surg Endosc      | Stone, A.H. and Holubar, S. and Finlayson, S.                                                                                           | Exclude             | Conference Abstract Only          |
| Defining the Role of Minimally Invasive Proctectomy for Locally Advanced Rectal Adenocarcinoma.                                                                         | 2017 | Ann Surg         | Sujatha-Bhaskar S and Jafari MD and Gahagan JV and Inaba CS and Koh CY and Mills SD and Carmichael JC and Stamos MJ and Pigazzi A       | Include             |                                   |
| Quality and Location of the Surgical Episode Mediate a Large Proportion of Socioeconomic-Based Survival Disparities in Patients with Resected Stage I-III Colon Cancer. | 2021 | Ann Surg Oncol   | Swords DS and Bednarski BK and Messick CA and Tillman MM and Chang GJ and You YN                                                        | Exclude             | No comparison for robotic surgery |
| The relationship between race and established risk factors for the delay of adjuvant therapy in rectal cancer                                                           | 2018 | Dis Colon Rectum | Talukder, A. and Young, M. and Hooks, V.H. and Mitchell, A.B. and Albo, D. and King, R.                                                 | Exclude             | Conference Abstract Only          |

| <b>Title</b>                                                                                                                            | <b>Year</b> | <b>Journal</b>        | <b>Authors</b>                                                                                                                 | <b>Include or Exclude?</b> | <b>Exclusion Reason</b>                        |
|-----------------------------------------------------------------------------------------------------------------------------------------|-------------|-----------------------|--------------------------------------------------------------------------------------------------------------------------------|----------------------------|------------------------------------------------|
| Laparoscopic resection of colorectal carcinoma: A comparative study of an initial experience                                            | 2017        | Chirurgia             | Tatulli, F. and Caputi, A. and Caraglia, A. and Notarnicola, A. and Carbone, F. and Chetta, N. and Ruggieri, T. and Chetta, G. | Exclude                    | No comparison for robotic surgery              |
| Robotic vs. Laparoscopic rectal resection for rectal adenocarcinoma Åç : A nationwide analysis of surgical outcomes                     | 2015        | Surg Endosc           | Thirun, P. and Gabriel, E. and Nurkin, S.J.                                                                                    | Exclude                    | Conference Abstract Only                       |
| Uptake of laparoscopic resection for colorectal cancer in Queensland, 1999/2000 to 2007/2008                                            | 2009        | Asia Pac J Clin Oncol | Thompson, B. and Coory, M. and Lumley, J.                                                                                      | Exclude                    | Conference Abstract Only                       |
| Minimally invasive surgery: national trends in adoption and future directions for hospital strategy                                     | 2013        | Surg Endosc           | Tsui, Charlotte; Klein, Rachel; Garabrant, Matthew;                                                                            | Exclude                    | No comparison specific to colorectal surgeries |
| Insurance status, not race, is associated with use of minimally invasive surgical approach for rectal cancer                            | 2017        | Ann. Surg.            | Turner, M. and Adam, M.A. and Sun, Z. and Kim, J. and Ezekian, B. and Yerokun, B. and Mantyh, C. and Migaly, J.                | Exclude                    | No comparison for robotic surgery              |
| Cost analysis of laparoscopic versus open colectomy in patients with colon cancer: results from a large nationwide population database. | 2012        | Am Surg               | Vaid S and Tucker J and Bell T and Grim R and Ahuja V                                                                          | Exclude                    | No comparison for robotic surgery              |
| Racial disparity in short-term outcomes after colon resection for cancer - A NSQIP analysis                                             | 2015        | Dis Colon Rectum      | Venkat, R. and Choudhury, N. and Nfonsam, V.                                                                                   | Exclude                    | Conference Abstract Only                       |
| Minimally Invasive Surgery for Colorectal Cancer: Hospital Type Drives Utilization and Outcomes.                                        | 2020        | J Surg Res            | Villano AM and Zeymo A and Houlihan BK and Bayasi M and Al-Refaie WB and Chan KS                                               | Include                    |                                                |

| <b>Title</b>                                                                                                                                                                            | <b>Year</b> | <b>Journal</b>                 | <b>Authors</b>                                                                                                                                                           | <b>Include or Exclude?</b> | <b>Exclusion Reason</b>                        |
|-----------------------------------------------------------------------------------------------------------------------------------------------------------------------------------------|-------------|--------------------------------|--------------------------------------------------------------------------------------------------------------------------------------------------------------------------|----------------------------|------------------------------------------------|
| Inpatient mortality, healthcare resource utilization, and complications of elective laparoscopic versus open colectomy in colon cancer patients: A nationwide inpatient sample analysis | 2020        | J. Clin. Oncol.                | Vohra, I. and Katiyar, V. and Attar, B. and Lingamaneni, P. and Moturi, K.R. and Singh, S.R.K. and Malapati, S.J. and Farooq, M.Z. and Gupta, S.                         | Exclude                    | Conference Abstract Only                       |
| National trends and disparities of minimally invasive surgery for localized renal cancer, 2010 to 2015                                                                                  | 2019        | Urol Oncol                     | Xia, Leilei; Talwar, Ruchika; Taylor, Benjamin L; Shin, Michael H; Berger, Ian B; Sperling, Colin D; Chelluri, Raju R; Zambrano, Ibaro A; Raman, Jay D; Guzzo, Thomas J; | Exclude                    | No comparison specific to colorectal surgeries |
| Incidence of minimally invasive colorectal cancer surgery at National Comprehensive Cancer Network centers.                                                                             | 2015        | J Natl Cancer Inst             | Yeo H and Niland J and Milne D and ter Veer A and Bekaii-Saab T and Farma JM and Lai L and Skibber JM and Small W Jr and Wilkinson N and Schrag D and Weiser MR          | Exclude                    | No comparison for robotic surgery              |
| Comparison of open, laparoscopic, and robotic colectomies using a large national database: outcomes and trends related to surgery center volume                                         | 2016        | Diseases of the Colon & Rectum | Yeo, Heather L; Isaacs, Abby J; Abelson, Jonathan S; Milsom, Jeffrey W; Sedrakyan, Art;                                                                                  | Include                    |                                                |
| Trends in uptake of minimally invasive surgery for colorectal cancer resection: A bi-national perspective                                                                               | 2019        | Dis Colon Rectum               | Zhu, K.J. and Kong, J.C. and Bell, S. and Warriar, S.                                                                                                                    | Exclude                    | Conference Abstract Only                       |
