# Supplementary material
Source: PubMed Central journal article supplement (PMC10947550)
Supplement: NIHMS1918973-supplement-Supplementary_Material_3.pdf [file NIHMS1918973-supplement-Supplementary_Material_3.pdf]

**Supplemental Digital Content 3.** Summary of Study Characteristics Across the 29 Included Studies

| Citation                  | Data Source       | Geographic Location       | Type of Surgery | Sample Size | Mean Age <sup>a</sup> | % Female | % Race/Ethnicity <sup>b</sup>                                                                   | Surgical Location | Factors Examined                                                                                                         |
|---------------------------|-------------------|---------------------------|-----------------|-------------|-----------------------|----------|-------------------------------------------------------------------------------------------------|-------------------|--------------------------------------------------------------------------------------------------------------------------|
| Abd El Aziz et al. (2020) | NSQIP (2012-2018) | US                        | Elective        | 1,199       | 57 <sup>a</sup>       | 65.1     | 71.2 White, 18.1 Black, 11.0 Other, 8.8 Unknown, 6.4 Hispanic, 0.8 Asian                        | Colon             | Gender/sex, age, race/ethnicity, surgical location, co-morbidities                                                       |
| Addae et al. (2017)       | NIS (2009-2012)   | US                        | Elective        | 261,886     | 67 <sup>a</sup>       | 48.90    | 78.6 White, 9.1 Black, 6.4 Hispanic, 5.9 Other                                                  | Colorectal        | Income status, gender/sex, age, race/ethnicity, insurance status, co-morbidities, hospital size, year, surgical location |
| Alharthi et al. (2020)    | NIS (2008-2014)   | US                        | Elective        | 197,053     | 58.30                 | 52.60    | 81.5 White, 5.7 Black, 8.4 Hispanic, 1.7 Asian/Pacific Islander, 0.4 Native American, 2.3 Other | Colon             | Gender/sex, age, race/ethnicity, insurance status, co-morbidities, location, hospital type                               |
| Bell et al. (2019)        | CSSANZ (2019)     | Australia and New Zealand | Unspecified     | 72          |                       | 8.50     |                                                                                                 | Rectal            | Gender/sex, co-morbidities                                                                                               |
| Buonpane et al. (2017)    | NCDB (2010-2012)  | US                        | Unspecified     | 23,857      |                       | 39.82    | 8.69 Black, 5.7 Other, 85.61 White                                                              | Rectal            | Gender/sex, age, race/ethnicity, insurance status, co-morbidities,                                                       |

| Citation                | Data Source                                     | Geographic Location | Type of Surgery       | Sample Size | Mean Age <sup>a</sup> | % Female | % Race/Ethnicity <sup>b</sup>                                | Surgical Location | Factors Examined                                                                                                                    |
|-------------------------|-------------------------------------------------|---------------------|-----------------------|-------------|-----------------------|----------|--------------------------------------------------------------|-------------------|-------------------------------------------------------------------------------------------------------------------------------------|
| Chung et al. (2021)     | Premier Hospital Database (2001-2015)           | US                  | Unspecified           | 643,052     | 62.50                 | 53.90    | 9.5 Black, 2.7 Hispanic, 15.9 other, 71.9 White              | Colorectal        | location, hospital type<br>Gender/sex, age, race/ethnicity, insurance status, co-morbidities, location, hospital size, marital size |
| Concors et al. (2019)   | NCDB (2010-2015)                                | US                  | Unspecified           | 8,107       |                       | 37.10    | 81.2 White, 6.8 Black, 6.1 Hispanic, 5.9 Other               | Rectal            | Income status, gender/sex, age, race/ethnicity, insurance status, co-morbidities, hospital type, location                           |
| Damle et al. (2016)     | UHC (2008-2011)                                 | US                  | Elective and Emergent | 82,474      | 57 <sup>a</sup>       | 50.00    | 84.47 White, 13.18 Black, 2.35 Asian                         | Colorectal        | Race/Ethnicity                                                                                                                      |
| Fantus et al. (2018)    | NCDB (2010-2013)                                | US                  | Unspecified           | 5,837       |                       |          |                                                              | Colorectal        | Income status, socioeconomic status, hospital type, co-morbidities                                                                  |
| Fernandez et al. (2013) | MED-VAMC Colorectal Cancer Database (2002-2012) | Texas, US           | Unspecified           | 72          |                       | 3.00     | 71 White, 6 non-Black Hispanic, 21 African American, 3 Other | Rectal            | Gender/sex, age, race/ethnicity, co-morbidities                                                                                     |
| Gabriel et al. (2016)   | NCDB (2004-2011)                                | US                  | Elective and Emergent | 8,633       |                       | 47.10    | 75.2 White, 13.1 Black, 0.3 Native American,                 | Rectal            | Income status, insurance status, hospital type, socioeconomic                                                                       |

| Citation                     | Data Source      | Geographic Location | Type of Surgery       | Sample Size      | Mean Age <sup>a</sup> | % Female      | % Race/Ethnicity <sup>b</sup>                                                                              | Surgical Location | Factors Examined                                                                                                                |
|------------------------------|------------------|---------------------|-----------------------|------------------|-----------------------|---------------|------------------------------------------------------------------------------------------------------------|-------------------|---------------------------------------------------------------------------------------------------------------------------------|
| Gabriel Lee et al. (2017)    | NIS (2002-2012)  | US                  | Elective and Emergent | 1,265,684        | 67.96                 | 49.64         | 4.7 Asian, 5.7 Hispanic, 0.9 Other                                                                         | Colorectal        | status, age, gender/sex, race/ethnicity, location, co-morbidities<br>Location, hospital type, co-morbidities, type of admission |
| Halabi et al. (2013)         | NIS (2009-2010)  | US                  | Elective              | 128,288          | 62 <sup>a</sup>       | 51.50         | 2.35 White, 6.93 Black, 5.49 Hispanic, 1.61 Asian or Pacific Islander, 0.32 Native American, 2.01 Other    | Colorectal        | Gender/sex, age, race/ethnicity, insurance status, co-morbidities                                                               |
| Konstantinidis et al. (2020) | NCDB (2010-2014) | US                  | Unspecified           | 260,669 & 52,239 | 68 <sup>a</sup>       | 51.55 & 39.43 | 75.74 Caucasian, 12.20 African American, 12.05 Other & 77.48 Caucasian, 8.25 African American, 14.27 Other | Colorectal        | Income status, gender/sex, age, race/ethnicities, insurance status, co-morbidities, hospital type                               |
| Lo et al. (2020)             | NCDB (2010-2016) | US                  | Elective              | 324,784          | 68.14                 | 50.71         | 83.56 White, 10.33 Black, 5.32 Other,                                                                      | Colorectal        | Income status, gender/sex, age, race/ethnicities, insurance status,                                                             |

| Citation                  | Data Source      | Geographic Location | Type of Surgery | Sample Size | Mean Age <sup>a</sup> | % Female | % Race/Ethnicity <sup>b</sup>                                                                             | Surgical Location | Factors Examined                                                                                                                        |
|---------------------------|------------------|---------------------|-----------------|-------------|-----------------------|----------|-----------------------------------------------------------------------------------------------------------|-------------------|-----------------------------------------------------------------------------------------------------------------------------------------|
|                           |                  |                     |                 |             |                       |          | 0.78<br>Unknown                                                                                           |                   | location, hospital type, location, socioeconomic status, co-morbidities                                                                 |
| Miller et al. (2016)      | NSQIP (2013)     | US                  | Elective        | 11,920      | 60.19                 | 51.94    |                                                                                                           | Colon             | Gender/sex, ASA class, co-morbidities                                                                                                   |
| Mirkin et al. (2018)      | NCDB (2010-2012) | US                  | Unspecified     | 15,112      |                       | 50.09    | 77.03 White (non-Hispanic),<br>10.49 Black (non-Hispanic),<br>3.82 Other (non-Hispanic),<br>8.75 Hispanic | Colon             | Income status, gender/sex, age, race/ethnicity, insurance status, co-morbidities, location, hospital type                               |
| Moghadamyeg et al. (2015) | NIS (2009-2012)  | US                  | Elective        | 13,622      |                       | 39.57    | 67.86 White,<br>8.08 Black,<br>6.56 Hispanic,<br>2.53 Asian,<br>2.7 Other                                 | Colon             | Gender/sex, age, race/ethnicity, co-morbidities, volume, location, hospital type                                                        |
| Ofshteyn et al. (2020)    | NCDB (2010-2014) | US                  | Unspecified     | 33,503      |                       | 38.00    | 78.5 White,<br>7.8 Black,<br>13.7 Other                                                                   | Rectal            | Income status, socioeconomic status, gender/sex, age, race/ethnicity, insurance status, location, volume, hospital type, co-morbidities |

| Citation                       | Data Source                                     | Geographic Location                           | Type of Surgery       | Sample Size | Mean Age <sup>a</sup> | % Female | % Race/Ethnicity <sup>b</sup>                                                                              | Surgical Location | Factors Examined                                                                                                      |
|--------------------------------|-------------------------------------------------|-----------------------------------------------|-----------------------|-------------|-----------------------|----------|------------------------------------------------------------------------------------------------------------|-------------------|-----------------------------------------------------------------------------------------------------------------------|
| Osagiede et al. (2019)         | Florida Inpatient Discharge Dataset (2013-2015) | Florida, US                                   | Elective              | 10,513      | 68.40                 | 48.10    | 83.8 White, 9.5 African American or Black, 6.7 Other, 15.0 Hispanic or Latino, 85.0 Non-Hispanic or Latino | Colorectal        | Gender/sex, age, race/ethnicity, insurance status, co-morbidities, location                                           |
| Panteleimonities et al. (2018) |                                                 | United Kingdom, Portugal                      | Elective and Emergent | 1,386       |                       | 45.96    |                                                                                                            | Colorectal        | Co-morbidities                                                                                                        |
| Parascandola et al. (2020)     | NCDB (2010-2016)                                | US                                            | Unspecified           | 24,719      | 61.18                 | 39.10    | 85.65 White, 7.49 Black, 6.12 Other, 0.74 Unknown                                                          | Rectal            | Age, income status, gender/sex, race/ethnicity, insurance status, co-morbidities, hospital type, socioeconomic status |
| Sastow et al. (2019)           | SIDs (2009-2014)                                | California, Florida, New York and Kentucky US | Elective and Emergent | 444,877     | 61.40                 | 51.80    | 70.2 White, 10.6 Black, 11.1 Hispanic, 6.5 Other, 1.5 Missing                                              | Colon             | Insurance status                                                                                                      |
| Shootman et al. (2017)         | NSQIP(2013-2015)                                | US                                            | Elective              | 13,077      |                       | 50.40    | 1.1 White, 10.9 African American, 4.8 Other, 13.3 Unknown                                                  | Colon             | Age, race/ethnicity, co-morbidities                                                                                   |

| Citation                      | Data Source                                                                                                                                                                                                    | Geographic Location | Type of Surgery | Sample Size | Mean Age <sup>a</sup> | % Female | % Race/Ethnicity <sup>b</sup>                                                     | Surgical Location | Factors Examined                                                                                                                                                                        |
|-------------------------------|----------------------------------------------------------------------------------------------------------------------------------------------------------------------------------------------------------------|---------------------|-----------------|-------------|-----------------------|----------|-----------------------------------------------------------------------------------|-------------------|-----------------------------------------------------------------------------------------------------------------------------------------------------------------------------------------|
| Simon et al. (2021)           | NCDB (2010-2017)                                                                                                                                                                                               | US                  | Elective        | 31,910      | 71 <sup>a</sup>       | 39.29    | 84.55 Caucasian, 6.84 Black, 3.62 Asian/Indian, 4.99 Hispanic, 95.01 Non-Hispanic | Rectal            | Income status, gender/sex, race/ethnicity, insurance status, co-morbidities, location, hospital type, age, location, volume                                                             |
| Spaulding et al. (2021)       | Florida Inpatient Discharge Dataset, American Hospital Association, Medicare Hospital Cost Report, Area Health Resource File, and the Florida Health Community Health Assessment Resource Tool Set (2013–2015) | Florida, US         | Unspecified     | 159         |                       |          |                                                                                   | Colorectal        | Income status, socioeconomic status, race/ethnicity, insurance status, co-morbidities, hospital type, population size, average total margin (3 year), average operating margin (3 year) |
| Sujatha-Bhaskar et al. (2017) | NCDB (2010-2014)                                                                                                                                                                                               | US                  | Elective        | 6,313       | 58 <sup>a</sup>       | 38.43    | 6.84 Black, 87.14                                                                 | Rectal            | Gender/sex, race/ethnicity,                                                                                                                                                             |

| Citation              | Data Source      | Geographic Location | Type of Surgery       | Sample Size | Mean Age <sup>a</sup> | % Female | % Race/Ethnicity <sup>b</sup> | Surgical Location | Factors Examined                                                                                             |
|-----------------------|------------------|---------------------|-----------------------|-------------|-----------------------|----------|-------------------------------|-------------------|--------------------------------------------------------------------------------------------------------------|
| Villano et al. (2020) | NCDB (2010-2015) | US                  | Elective and Emergent | 234,935     | 67.01                 | 49.70    | Caucasian, 6.23 Other         | Colorectal        | insurance status, co-morbidities, hospital type, age, Location, volume, hospital type, grade, co-morbidities |
| Yeo et al. (2016)     | NIS (2009-2012)  | US                  | Elective              | 509,029     | 62.50                 | 54.40    | 80.6 White, 19.4 Other        | Colon             | Gender/sex, age, race/ethnicity, insurance status, location, volume, hospital type, age, co-morbidities      |

Abbreviations: NSQIP = National Quality Improvement Program database. NIS = National Inpatient Sample. CCANZ = Colorectal Surgical Society of Australia and New Zealand. NCDB = National Cancer Database. UHC = University Health System Consortium. SIDs = State Inpatient Databases.

<sup>a</sup>Age with this superscript denote that a median age was used instead of the mean age. <sup>b</sup>The labeling of racial/ethnic groups from each study was preserved.
